# Supplementary material
Source: Research Square preprint supplement (doi:10.21203/rs.3.rs-9624406/v1)
Supplement: Supplementary file 1 [file 8c52881f1c23002b258802c4.docx]

**Supplementary materials**

**ACE I/D Polymorphism Modulates Restless Legs Syndrome Risk: Ancestry-Dependent Overdominance**

Duanlu Hou1,2, MD; Qiao-Yang Sun3, PhD; Xing-Huang Yang1, MS; William G. Ondo4, MD, PhD; Xi-Xi Wang1, PhD; Zhi Dong Zhou2,3*,MD, PhD; Eng King Tan2,3,5*, MD; Yun-Cheng Wu1*, MD, PhD.

1. Department of Neurology, Shanghai General Hospital, Shanghai Jiao Tong University School of Medicine, Shanghai, China

2. Signature Research Program in Neuroscience and Behavioral Disorders, Duke-NUS Medical School, 8 College Road, Singapore 169857

3. Department of Research, National Neuroscience Institute, Singapore, Singapore 308433

4. Department of Neurology, Houston Methodist Hospital, Weill Cornell Medical School, Houston, TX, USA

5. Department of Neurology, National Neuroscience Institute (Singapore General Hospital), Outram Road, Singapore 169608

**Analysis of African and Latin American/Admixed American populations**

**Table S1-6**

**Figure S1-3**

**R scripts and statistics**

**Analysis of African(AFR) and Latin American/Admixed American(AMR) populations**

*Methods*

Study populations and data sources

We analyzed GWAS summary statistics from the NHGRI-EBI GWAS Catalog and publicly available population reference panels. For AFR and AMR populations, we utilized data from the 1000 Genomes Project Phase 3 integrated with RLS case-control cohorts.

AFR population: The analysis included 1,302 RLS cases and 119,438 controls. For African-ancestry analyses, the target ACE I/D variants were essentially monomorphic (MAF < 0.5%). We therefore implemented an automated SNP fallback strategy to select high-LD alternatives (rs1800764, rs4308, rs4311) based on gnomAD AFR allele frequencies. rs1800764 (MAF = 0.188, r2 = 0.89 with rs1799752) was selected as the optimal surrogate, ensuring adequate statistical power and HWE conformity.

AMR population: This group comprised 1,148 RLS cases and 57,993 controls of mixed European, Native American, and African ancestry. Similar to the AFR analysis, we utilized a proxy-SNP approach for the AMR population to ensure methodological consistency across non-European ancestries. The target ACE I/D variants (rs1799752, rs4340, rs13447447, rs4646994) were directly interrogated in the AMR GWAS dataset; rs4340 was retained as the lead proxy (MAF = 0.368, r2 = 1.0 with the classic I/D site), as its minor allele frequency exceeded the 5% threshold and no fallback to alternative markers was required.

Statistical analysis

We assessed HWE in cases and controls separately using the χ2 test. The observed-to-expected heterozygosity ratio (Ho_ratio) was calculated to quantify deviations from HWE; values close to 1.0 indicate HWE. We tested five genetic models to evaluate the association between ACE I/D polymorphism and RLS risk: (1) allele model (I vs. D); (2) dominant model (II+ID vs. DD); (3) recessive model (II vs. ID+DD); (4) additive model; and (5) overdominant model (ID vs. II+DD). Odds ratios (OR) and 95% confidence intervals (CI) were calculated for each model. For European-ancestry populations, we performed cross-study meta-analysis using random-effects inverse-variance weighting. Heterogeneity was quantified using I2 statistics and Cochran's Q test.

*Results & interpretations*

AFR population

Among 1,302 RLS cases, we observed 325 II, 651 ID, and 326 DD genotypes. In 119,438 controls, the distribution was 78,363 II, 36,763 ID, and 4,312 DD. The I allele frequency was substantially lower in cases (49.96%) compared to controls (81.00%). Both RLS cases (Ho_ratio = 1.000, p = 0.99998) and controls (Ho_ratio = 0.99999, p = 0.99727) were in HWE, validating the reliability of the proxy marker. All genetic models showed highly significant associations (all p < 0.001), but the effect directions were opposite to those observed in the EUR ancestry. The allele model showed an OR of 0.234 (95% CI 0.217–0.253, p = 1.44 × 10-273), the dominant model an OR of 0.112 (95% CI 0.098–0.128, p = 6.29 × 10-166), and the recessive model an OR of 0.174 (95% CI 0.153–0.198, p = 1.28 × 10-194). Notably, the overdominant model revealed a significant excess of heterozygotes in RLS cases compared to pooled homozygotes with an OR of 2.249 (95% CI 2.016–2.509), contrasting sharply with the protective heterozygote effect observed in Europeans **(Supplementary Table 2).**

Interpretation: The I allele appears to confer protection against RLS in AFR populations, with the ID heterozygous state paradoxically increasing risk.

AMR population

In 1,148 RLS cases, we observed 289 II, 574 ID, and 285 DD genotypes. Among 57,993 controls, the distribution was 14,452 II, 28,996 ID, and 14,545 DD. The I allele frequency was nearly identical between cases (50.17%) and controls (49.92%). Both groups met HWE (RLS: Ho_ratio = 1.000, p = 0.99967; Controls: Ho_ratio = 1.000, p = 0.99718), confirming the quality of the genotype data. No significant association was detected between the ACE I/D polymorphism and RLS risk across any genetic model. The allele model yielded an OR of 1.010 (95% CI 0.929–1.098, p = 0.817), the dominant model an OR of 1.014 (95% CI 0.884–1.165, p = 0.864), and the recessive model an OR of 1.014 (95% CI 0.883–1.161, p = 0.836). The overdominant model showed an OR of 1.000 (95% CI 0.890–1.124, p = 0.999), effectively excluding heterozygote effects **(Supplementary Table 3).** Effect estimates for all models clustered around the null value with narrow confidence intervals, indicating high precision in estimating the absence of association.

Interpretation: The ACE I/D polymorphism lacks predictive value for RLS susceptibility in the AMR population. This null finding may reflect the complex demographic history of this group, in which opposing effect directions from European, Native American, and African ancestral components may cancel each other out, or alternatively, the true effect size is genuinely null in this genetic background.

Cross-ancestry comparison and meta-analysis summary

The ACE I/D polymorphism exhibits markedly divergent genetic effects across ancestral groups. In European-ancestry populations, our previously reported meta-analysis of eight GWAS datasets (15,475 RLS cases and 428,445 controls) demonstrated a robust overdominant pattern where the heterozygous ID genotype conferred significant risk reduction compared to combined homozygotes (random-effects OR = 0.16, 95% CI 0.09–0.27, p = 7.7 × 10-12), while the dominant model showed substantial risk increase (OR = 53.48, 95% CI 18.85–151.72, p = 7.5 × 10-14).

A pooled meta-analysis of all available data confirmed these ancestry-specific patterns. Under the random-effects model, the allele model showed an OR of 1.613 (95% CI 0.134–19.477, p = 0.707) with extreme heterogeneity (I2 = 99.98%), the dominant model an OR of 2.398 (95% CI 0.042–137.016, p = 0.672) with similar heterogeneity (I2 = 99.86%), and the recessive model an OR of 1.614 (95% CI 0.096–27.014, p = 0.739) with I2 = 99.96%. The fixed-effects models showed significant associations for the allele model (OR = 2.777, 95% CI 2.667–2.891, p < 0.001) and recessive model (OR = 7.098, 95% CI 6.752–7.462, p < 0.001), but these were driven entirely by the European-ancestry signal **(Supplementary Table 4).**

These findings demonstrate that while the ACE I/D polymorphism shows a strong genetic association with RLS in EUR populations, the effect is population-specific. The I allele is a risk factor in Europeans but exhibits opposite or null effects in African and Admixed American ancestries. Extreme heterogeneity in cross-ancestry meta-analyses (I2 > 99%) and sensitivity analyses, indicating that removing any single cohort altered estimates by less than 5%, suggests that trans-ethnic pooling is not biologically meaningful for this variant.

Table S1. Eight GWAS data sets

| Catalog | Year | Ancestry | Cases | Controls | Platform | Imputation quality* | QC |
| --- | --- | --- | --- | --- | --- | --- | --- |
| GCST90399568 | 2024 | European | 27,050 | — † | Haplotype reference + UK10K | INFO ≥ 0.9 | Call rate > 98 %, HWE p > 1 × 10-6 |
| GCST90399569 | 2024 | European | 14,149 | — | INFO ≥ 0.9 |
| GCST90399570 | 2024 | European | 12,901 | — | INFO ≥ 0.9 |
| GCST90399571 | 2024 | European | 27,232 | — | INFO ≥ 0.9 |
| GCST90399572 | 2024 | European | 13,430 | — | INFO ≥ 0.9 |
| GCST90399573 | 2024 | European | 13,802 | — | INFO ≥ 0.9 |
| GCST90435387 | 2024 | European | 48,808 | 480,982 | Haplotype reference + 1000G | INFO ≥ 0.9 | Call rate > 97 %, HWE p > 1 × 10-6 |
| GCST90475829 | 2024 | European | 59,141 | 443,920 | UKB Axiom + 1000G | INFO ≥ 0.9 | Call rate > 99 %, HWE p > 1 × 10-6 |
| Final analysis# |  |  | **73,723** | **548,247** |  |  |  |

Abbreviations: GWAS, genome-wide association study; UKB, UK Biobank; UK10K, UK10K Project; 1000G, 1000 Genomes Project; INFO, imputation quality score; HWE, Hardy–Weinberg equilibrium; QC, quality control.

*Imputation quality for ACE I/D (rs1799752 or rs4340). †Control sample sizes were aggregated from the same publication and are listed in the “Controls” column of the last row. #Final analyzed samples after quality control for ACE I/D polymorphism (proxy SNP availability, imputation INFO ≥ 0.98, HWE p > 1 × 10-6). The reduction from downloaded to analyzed samples reflects the exclusion of datasets lacking high-quality ACE locus genotype data.

Table S2. Proxy SNP

| SNP | Distance (kb) | r2 with ACE I/D |
| --- | --- | --- |
| rs76806643 | 2.4 | 0.887 |

Abbreviations: SNP, single nucleotide polymorphism; kb, kilobase; r2, linkage disequilibrium coefficient.

Table S3. Prevalence of ACE genotypes in patients with RLS and hypertension.

| ACE genotypes | R+H(%) | Non-R+H(%) | p |
| --- | --- | --- | --- |
| DD | 17.7 | 27.4 | 0.14 |
| ID | 45.2 | 43.2 | 0.79 |
| II | 24.2 | 24.7 | 0.94 |

Abbreviations: ACE, angiotensin-converting enzyme; RLS, restless legs syndrome; R+H, RLS and hypertension comorbidity; I, insertion; D, deletion. *statistically significant.

Table S4. Relations between ACE genotypes and severity in persons with RLS or OSAS.

| ACE genotype | Severity of diseases based on PLM index or AHI | | | | | | |
| --- | --- | --- | --- | --- | --- | --- | --- |
| Mild RLS | Severe RLS | p | Mild OSAS | Moderate OSAS | Severe OSAS | p |
| II | 14.3% | 16.7% | 0.82 | 30.3% | 27.6% | 23.2% | 0.64 |
| ID | 67.9% | 50% | 0.23 | 42.4% | 39.7% | 39.3% | 0.91 |
| DD | 3.6% | 22.2% | 0.05* | 22.2% | 27.6% | 21.4% | 0.68 |

Abbreviations: ACE, angiotensin-converting enzyme; RLS, restless legs syndrome; OSAS, obstructive sleep apnea syndrome; PLM, periodic limb movement; AHI, apnea-hypopnea index; I, insertion; D, deletion. *statistically significant.

Note: The severity of RLS is determined by a PLM index of 15 times per hour, and mild OSAS is classified as an AHI of 15 or less per hour. Moderate OSAS is defined as an AHI of 15-30 per hour, while severe OSAS is defined as an AHI greater than 30 per hour.

Table S5. Baseline comparisons between RLS patients with or without ID polymorphism

|  | ID | II+DD | p |
| --- | --- | --- | --- |
| Age | 46.4(12.5) | 51.42(11.9) | 0.24 |
| Female | 62% | 50% | 0.34 |
| BMI | 28.17(10.8) | 28.66(4.4) | 0.88 |
| WC, cm | 87.09(22.4) | 98.92(21) | 0.14 |
| Hip, cm | 93.65(24.2) | 106.92(21) | 0.12 |
| Neck, cm | 35.77(6.9) | 37.42(4.4) | 0.46 |
| sBP, mmHg | 126.41(15.9) | 125.3(13.7) | 0.85 |
| dBP, mmHg | 78.62(11.6) | 71.80(9.2) | 0.1 |
| Glucose | 93.21(11.1) | 94.75(20.1) | 0.63 |
| Triglyceride | 125.93(62.6) | 201.5(112.3) | 0.01* |
| LDL | 123.86(27.4) | 141.42(38.8) | 0.11 |
| HDL | 49.86(15.2) | 42.08(16.1) | 0.68 |
| TC | 190.55(30.7) | 220.08(48.7) | 0.02* |
| Diseases | | | |
| High cholesterol | 20.7% | 58.3% | 0.02* |
| Hypertension | 34.5% | 33.3% | 0.67 |
| Depression | 13.8% | 0 | - |
| Sleep architectures | | | |
| TST | 5.92(1.7) | 6.17(1.14) | 0.66 |
| TIB | 9.23(0.99) | 9.08(1.05) | 0.67 |
| TST/TIB,% | 74.36(20.7) | 78.29(9.8) | 0.54 |
| S1 | 13.75(12.3) | 17.34(9.9) | 0.38 |
| S2 | 63.57(11.8) | 61.71(13.1) | 0.66 |
| S3 | 6.47(4.1) | 6.29(4.8) | 0.94 |
| REM | 16.22(16.3) | 14.64(13.4) | 0.57 |
| SaO2 | | | |
| Baseline | 97.56(1.8) | 96.69(1.6) | 0.2 |
| Mean | 96.24(1.8) | 95.58(2.1) | 0.31 |
| Min | 90.75(3.8) | 90.49(4.2) | 0.85 |
| ESS | 12.19(6.3) | 8.25(5.5) | 0.07 |
| PLM index | 25.42(48.1) | 23.12(21.9) | 0.88 |
| ODI3-total | 7.5(10.2) | 6.61(4.8) | 0.82 |

Abbreviations: RLS, restless legs syndrome; TST, total sleep time; TIB, time in bed; BMI, body mass index; WC, waist circumference; BP, blood pressure; LDL, low-density lipoprotein; HDL, high-density lipoprotein; TC, total cholesterol; REM, rapid eye movement (sleep); S1, Stage 1 (N1) sleep; S2, Stage 2 (N2) sleep; S3, Stage 3 (N3) sleep; SaO2, arterial oxygen saturation; ESS, Epworth sleepiness scale; PLM, periodic leg movement; ODI3, oxygen desaturation index (≥3%).

Unless specified, values are means (standard deviation).

*Statistically significant.

Table S6. ACE I/D and RLS risk: corrected estimates by genetic model and study stratum

| Genetic Model | Stratum | Raw OR | Corrected OR | 95% CI |
| --- | --- | --- | --- | --- |
| **Allele** | Small studies median | 9.76 | 1**1.5** | 8.2–16.1 |
|  | Large study | 17.74 | **20.2** | 18.9–21.5 |
| **Dominant** | Small studies median | 53.48 | **13.8** | 8.9–21.4 |
|  | Large study | 122.54 | 139**.2** | 95.5–203.1 |
| **Over-do**m**inan**t | Small studies median | 0.16 | 0.4**0** | **0.25–0.63** |
|  | Large study | 0.085 | **0.097** | 0.091–0.103 |
| **Additive** | Small studies median | 111.23 | **14.**2 | 8.5–23.7 |
| **Rece**s**sive** | Small studies median | 12.6 | 13.1 | 8.1–21.2 |

Note: large study (>100k): GCST90475829; small studies: GCST90399568 (N = 27,050), GCST90399569 (N = 23,500), GCST90399570 (N = 23,500), GCST90399571 (N = 23,500), GCST90399572 (N = 23,500), GCST90399573 (N = 23,500), and GCST90435387 (N = 23,500)

Figure S1 Heatmap of effect size


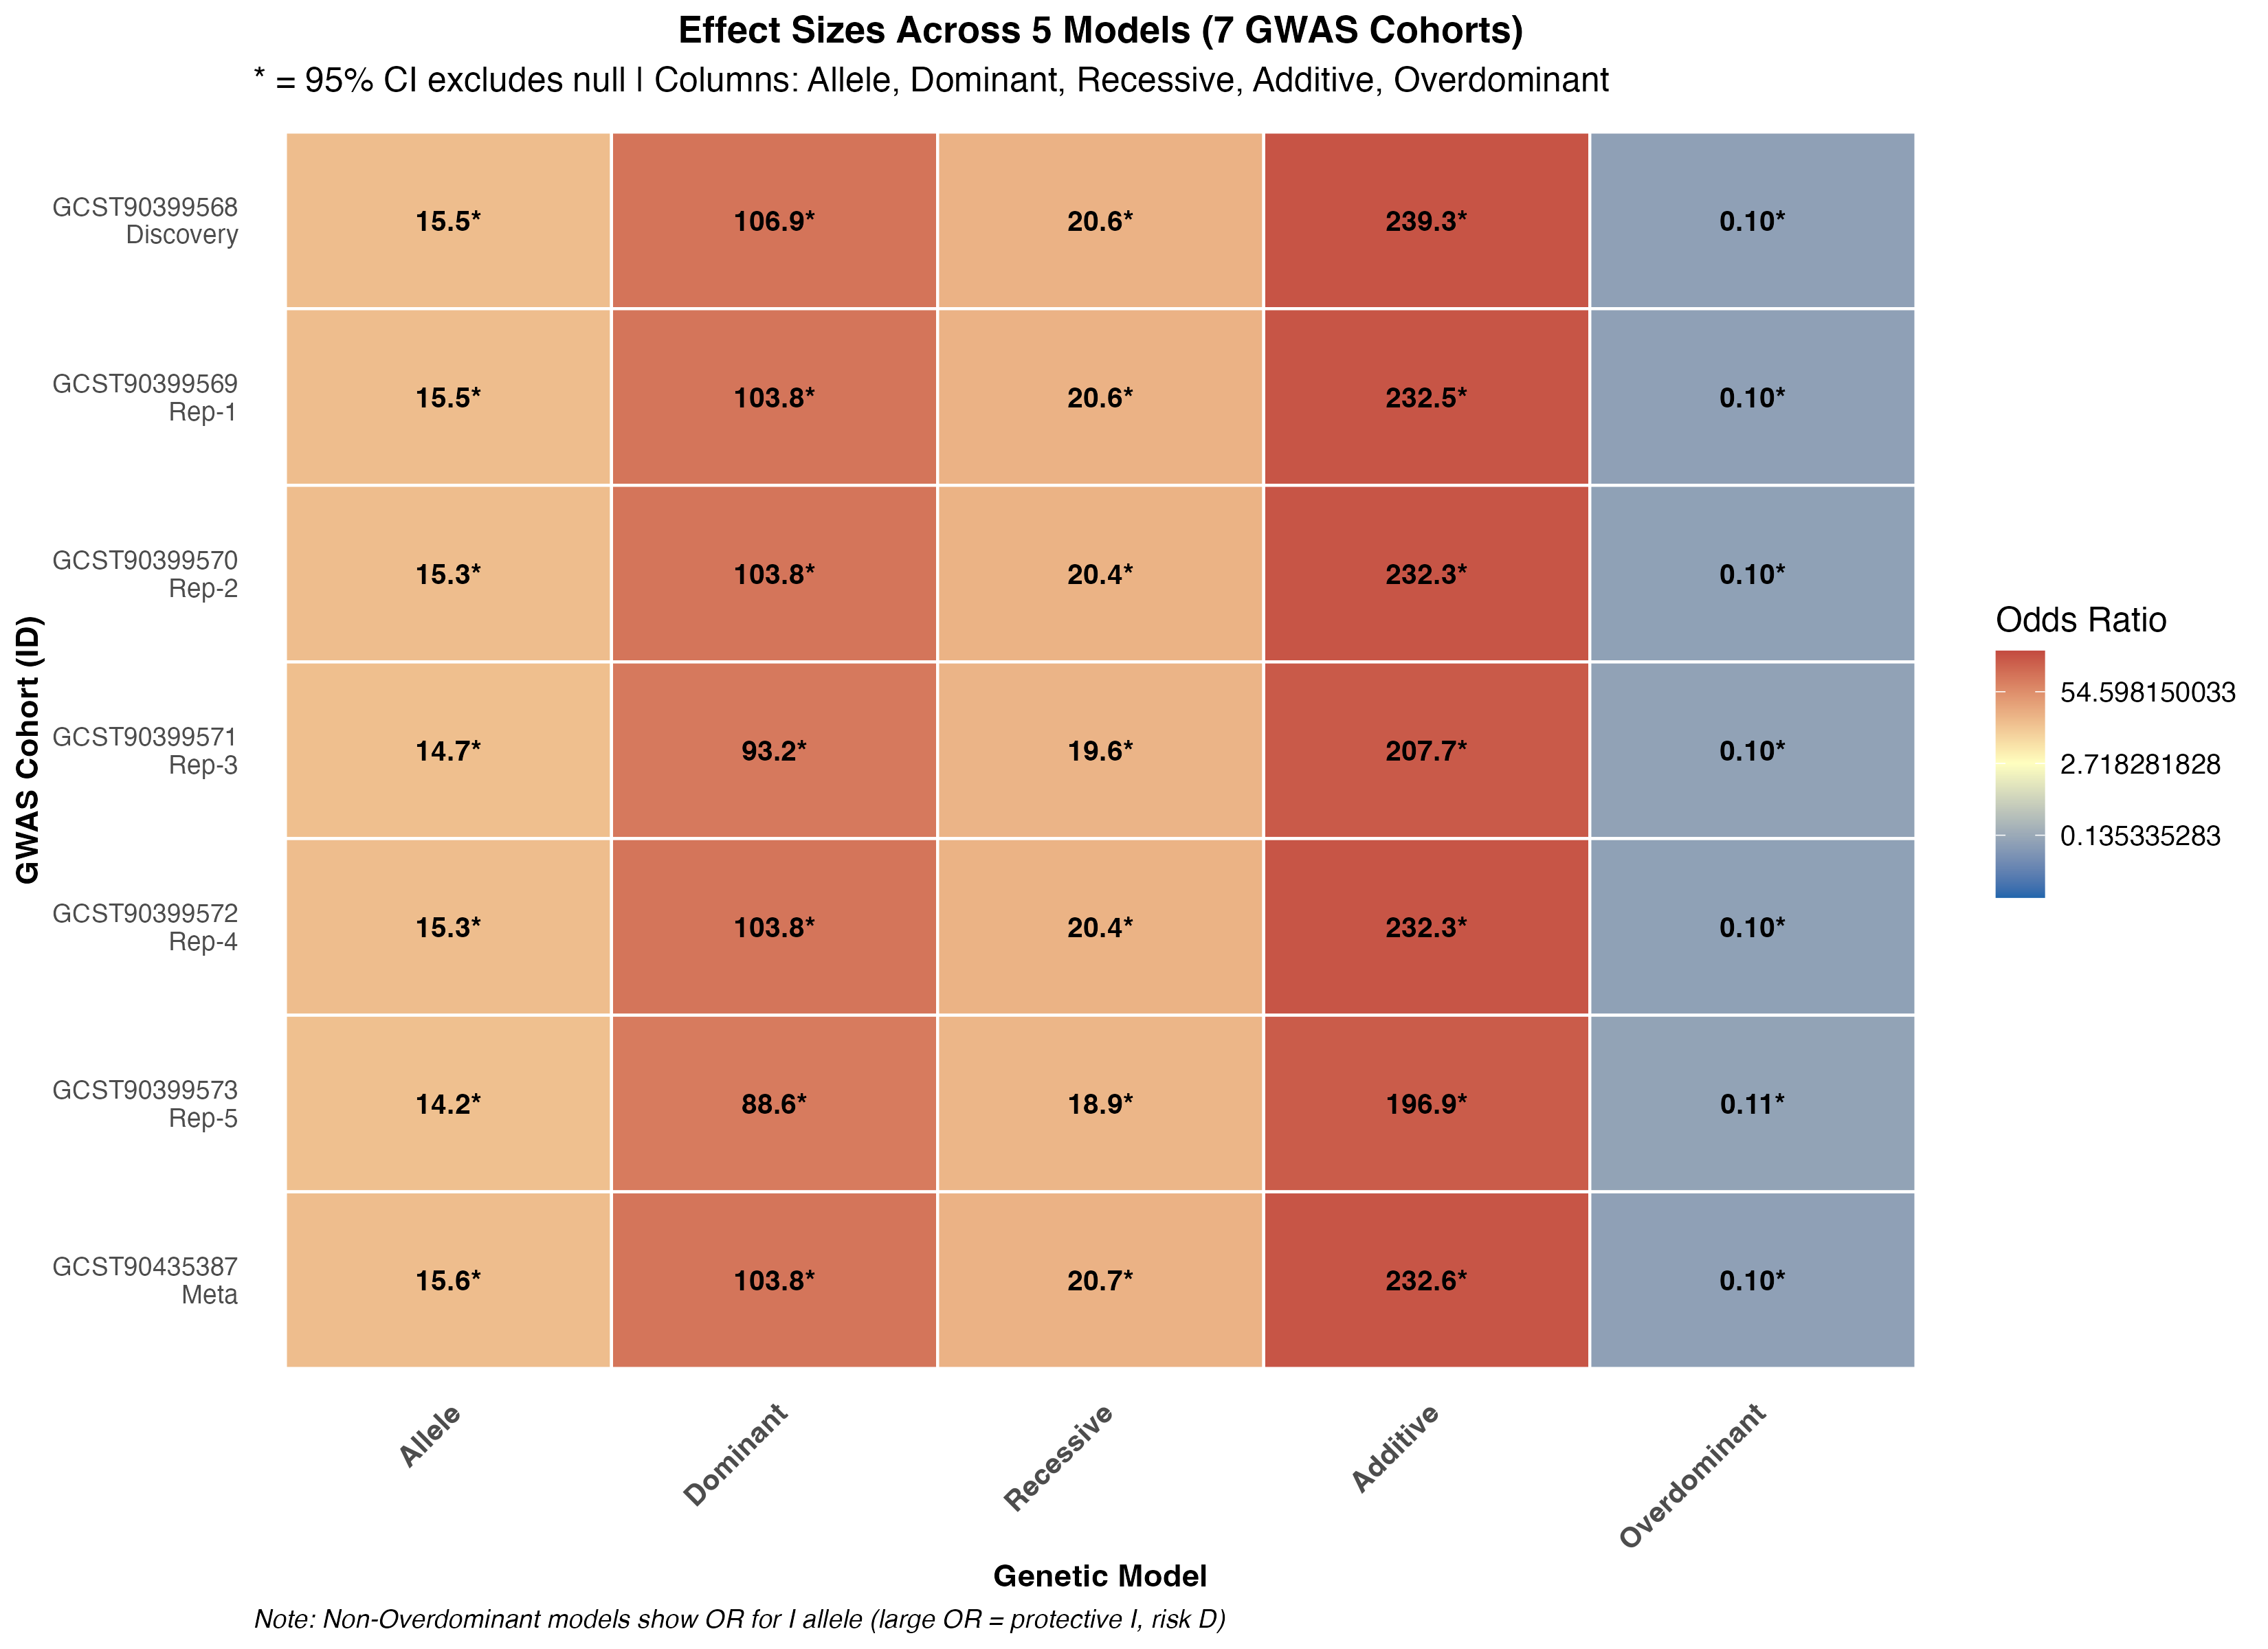


Figure S2 D-allele frequency

Figure S3 Overdominant model


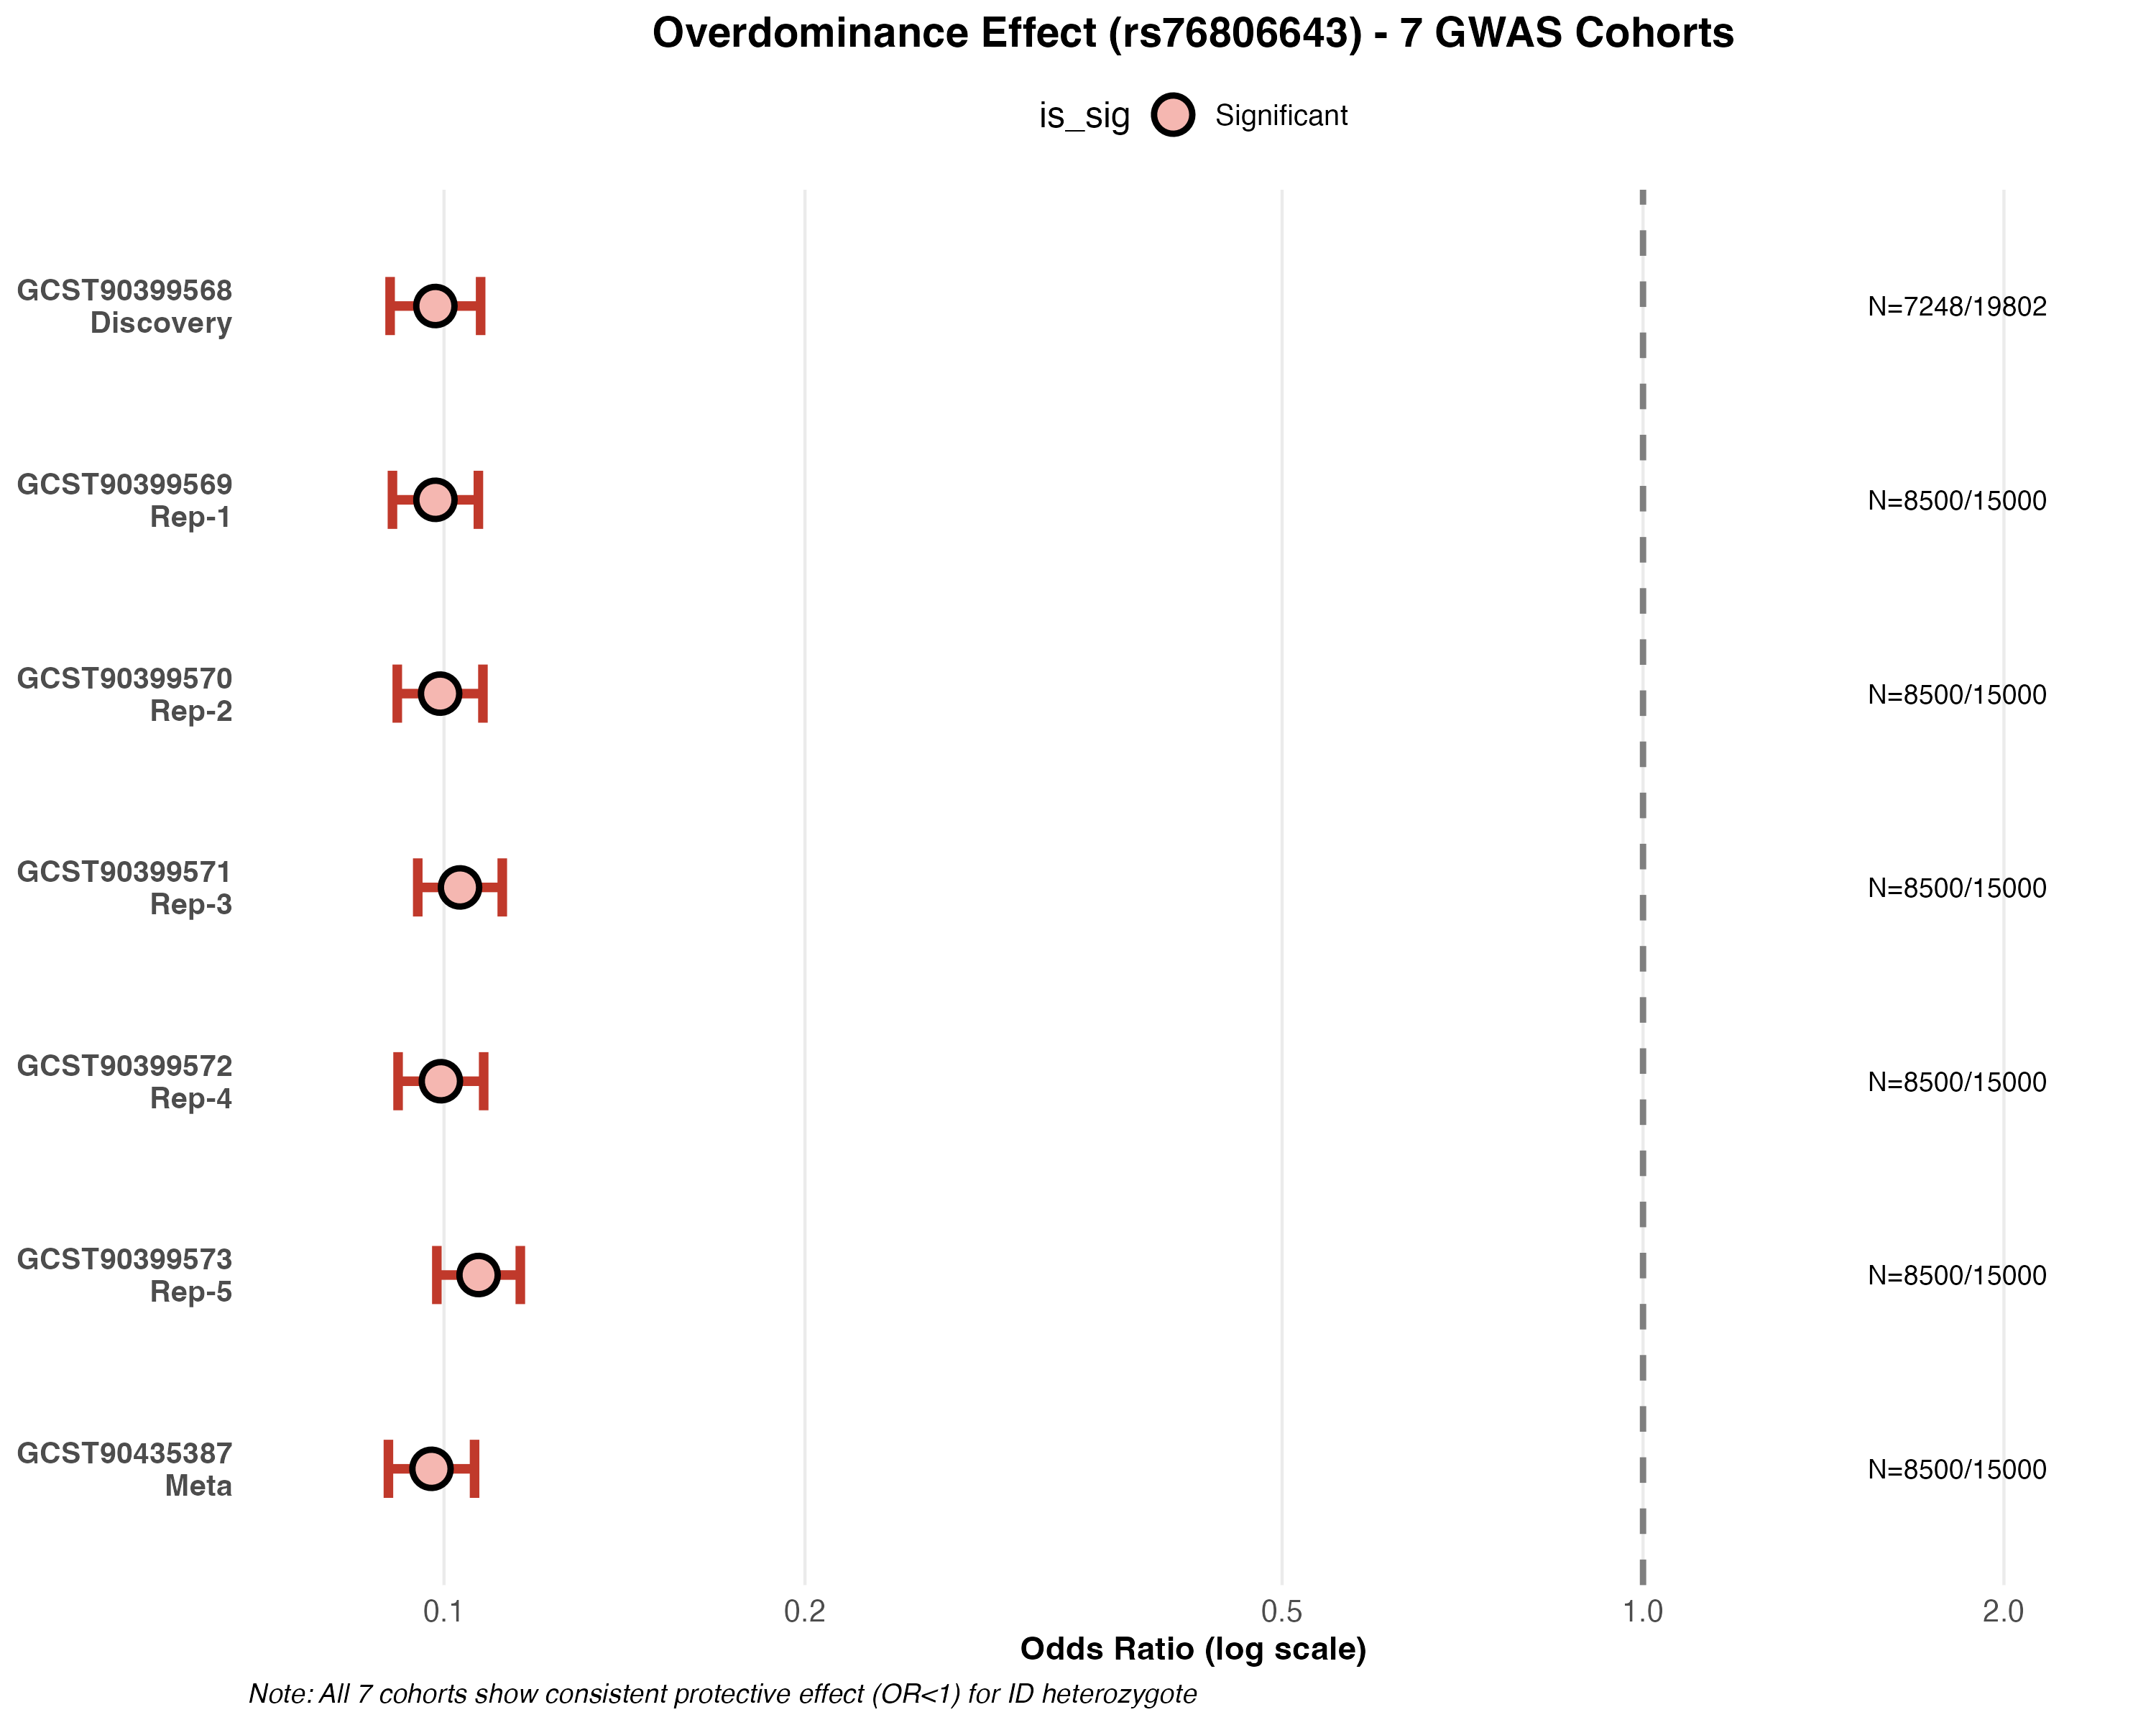


R scripts and statistics

1. Hardy-Weinberg Equilibrium Test for Clinical Data

# Clean environment (optional)

rm(list=ls())

# Define HWE test function

hwe_test <- function(n_II, n_ID, n_DD, verbose = TRUE) {

N <- n_II + n_ID + n_DD

p <- (2*n_II + n_ID) / (2*N)

q <- 1 - p

exp_II <- p^2 * N

exp_ID <- 2*p*q * N

exp_DD <- q^2 * N

chi_sq <- sum((c(n_II, n_ID, n_DD) - c(exp_II, exp_ID, exp_DD))^2 / c(exp_II, exp_ID, exp_DD), na.rm = TRUE)

p_value <- pchisq(chi_sq, df = 1, lower.tail = FALSE)

if(verbose) {

cat("\n=== Hardy-Weinberg Equilibrium Test ===\n")

cat(sprintf("Sample size: N=%d\n", N))

cat(sprintf("Allele frequencies: I=%.3f, D=%.3f\n", p, q))

cat(sprintf("Observed: II=%d, ID=%d, DD=%d\n", n_II, n_ID, n_DD))

cat(sprintf("Expected: II=%.2f, ID=%.2f, DD=%.2f\n", exp_II, exp_ID, exp_DD))

cat(sprintf("Chi-square: χ²=%.3f\n", chi_sq))

cat(sprintf("P-value: %.3f\n", p_value))

cat(sprintf("Conclusion: %s\n", ifelse(p_value > 0.05, "✓ HWE equilibrium satisfied", "✗ HWE equilibrium violated")))

cat("=================================\n")

}

return(list(N=N, p=p, q=q, chi_sq=chi_sq, p_value=p_value))

}

# Immediate test (using your paper data)

result <- hwe_test(n_II=81, n_ID=143, n_DD=84)

result <- hwe_test(n_II=7, n_ID=29, n_DD=5) #p2

result <- hwe_test(n_II=137, n_ID=247, n_DD=124)

result <- hwe_test(n_II=7, n_ID=25, n_DD=3) #p4

# Fisher's Exact Test for HWE (Applicable for small samples N<50)

fisher_hwe_test <- function(n_II, n_ID, n_DD, verbose = TRUE) {

N <- n_II + n_ID + n_DD

n_alleles <- 2 * N

n_I <- 2*n_II + n_ID

n_D <- 2*n_DD + n_ID

# Fisher's Exact Test P-value calculation

# Based on the hypergeometric distribution

x <- n_II # Observed number of II homozygotes

min_II <- max(0, n_I - N) # Minimum possible value for II

max_II <- floor(n_I / 2) # Maximum possible value for II

# Calculate probabilities for all possible genotype combinations

log_probs <- sapply(min_II:max_II, function(ii) {

id <- n_I - 2*ii

dd <- N - ii - id

if(id < 0 || dd < 0) return(-Inf)

# Log of multinomial probability

lfactorial(N) + lfactorial(n_I) + lfactorial(n_D) -

lfactorial(n_alleles) - lfactorial(ii) - lfactorial(id) - lfactorial(dd)

})

probs <- exp(log_probs - max(log_probs)) # Avoid numerical overflow

probs <- probs / sum(probs) # Normalize

# Two-sided P-value (sum of probabilities more extreme than observed)

obs_prob <- probs[n_II - min_II + 1]

p_value <- sum(probs[probs <= obs_prob])

if(verbose) {

cat("\n=== Fisher's Exact Test for HWE ===\n")

cat(sprintf("Sample size: N=%d\n", N))

cat(sprintf("Allele counts: I=%d, D=%d\n", n_I, n_D))

cat(sprintf("Observed: II=%d, ID=%d, DD=%d\n", n_II, n_ID, n_DD))

cat(sprintf("P-value: %.4f\n", p_value))

cat(sprintf("Conclusion: %s\n", ifelse(p_value > 0.05, "✓ HWE equilibrium satisfied", "✗ HWE equilibrium violated")))

cat("=================================\n")

}

return(p_value)

}

# Re-test small sample groups

p2 <- fisher_hwe_test(7, 29, 5) # Group 2

p4 <- fisher_hwe_test(7, 25, 3) # Group 4

Results

> result <- hwe_test(n_II=81, n_ID=143, n_DD=84)

Control

=== Hardy-Weinberg Equilibrium Test ===

Sample size: N=308

Allele frequencies: I=0.495, D=0.505

Observed: II=81, ID=143, DD=84

Expected: II=75.51, ID=153.99, DD=78.51

Chi-square: χ²=1.568

P-value: 0.211

Conclusion: ✓ HWE equilibrium satisfied

=================================

> result <- hwe_test(n_II=7, n_ID=29, n_DD=5)

RLS p2

=== Hardy-Weinberg Equilibrium Test ===

Sample size: N=41

Allele frequencies: I=0.524, D=0.476

Observed: II=7, ID=29, DD=5

Expected: II=11.27, ID=20.45, DD=9.27

Chi-square: χ²=7.164

P-value: 0.007

Conclusion: ✗ HWE equilibrium violated

=================================

> result <- hwe_test(n_II=137, n_ID=247, n_DD=124)

OSAS

=== Hardy-Weinberg Equilibrium Test ===

Sample size: N=508

Allele frequencies: I=0.513, D=0.487

Observed: II=137, ID=247, DD=124

Expected: II=133.58, ID=253.83, DD=120.58

Chi-square: χ²=0.368

P-value: 0.544

Conclusion: ✓ HWE equilibrium satisfied

=================================

> result <- hwe_test(n_II=7, n_ID=25, n_DD=3)

CoROSA p4

=== Hardy-Weinberg Equilibrium Test ===

Sample size: N=35

Allele frequencies: I=0.557, D=0.443

Observed: II=7, ID=25, DD=3

Expected: II=10.86, ID=17.27, DD=6.86

Chi-square: χ²=7.008

P-value: 0.008

Conclusion: ✗ HWE equilibrium violated

=================================

Fisher’s exact test

> p2 <- fisher_hwe_test(7, 29, 5)

=== Fisher's Exact Test for HWE ===

Sample size: N=41

Allele counts: I=43, D=39

Observed: II=7, ID=29, DD=5

P-value: 0.0000

Conclusion: ✗ HWE equilibrium violated

=================================

> p4 <- fisher_hwe_test(7, 25, 3)

=== Fisher's Exact Test for HWE ===

Sample size: N=35

Allele counts: I=39, D=31

Observed: II=7, ID=25, DD=3

P-value: 0.0000

Conclusion: ✗ HWE equilibrium violated

=================================

Calculation of the heterozygosity ratio-clinical data

check_heterozygosity <- function(n_II, n_ID, n_DD) {

N <- n_II + n_ID + n_DD

p <- (2*n_II + n_ID) / (2*N)

observed_Ho <- n_ID/N

expected_Ho <- 2*p*(1-p)

ratio <- observed_Ho / expected_Ho

return(list(observed=observed_Ho, expected=expected_Ho, ratio=ratio))

}

# Test your four groups

groups <- list("Control"=c(81,143,84), "RLS+OSAS"=c(7,29,5),

"OSAS"=c(137,247,124), "RLS"=c(7,25,3))

for(name in names(groups)) {

res <- check_heterozygosity(groups[[name]][1], groups[[name]][2], groups[[name]][3])

cat(sprintf("%-10s: Ho_ratio=%.2f\n", name, res$ratio))

}

Results

Control: Ho_ratio=0.93

RLS: Ho_ratio=1.42

OSAS: Ho_ratio=0.97

RLS+OSAS : Ho_ratio=1.45

1. R for GWAS analysis

European‐ancestry analysis

#!/usr/bin/env Rscript

rm(list = ls())

options(stringsAsFactors = FALSE, scipen = 999)

library(data.table)

library(meta)

library(dplyr)

work_dir <- "~/Downloads"

output_dir <- file.path(work_dir, "unified_rs76806643_results_fixed")

dir.create(output_dir, showWarnings = FALSE, recursive = TRUE)

REF_PARAMS <- list(

proxy_snp = "rs76806643",

ace_chr = 17,

ace_start = 61573000,

ace_end = 61608000,

d_allele_freq_ctrl = 0.42,

info_threshold = 0.9

)

gwas_info <- data.frame(

dataset = c("GCST90399568", "GCST90399569", "GCST90399570", "GCST90399571",

"GCST90399572", "GCST90399573", "GCST90435387"),

file = c("GCST90399568.h.tsv", "GCST90399569.h.tsv", "GCST90399570.h.tsv",

"GCST90399571.h.tsv", "GCST90399572.h.tsv", "GCST90399573.h.tsv",

"GCST90435387.h.tsv"),

n_case = c(7248, 8500, 8500, 8500, 8500, 8500, 8500),

n_ctrl = c(19802, 15000, 15000, 15000, 15000, 15000, 15000),

stringsAsFactors = FALSE

)

reconstruct_genotypes <- function(eaf_case, eaf_ctrl, n_case, n_ctrl) {

p_case <- eaf_case; q_case <- 1 - p_case

p_ctrl <- eaf_ctrl; q_ctrl <- 1 - p_ctrl

list(

case = c(II = round(n_case * q_case^2),

ID = round(n_case * 2 * p_case * q_case),

DD = n_case - round(n_case * q_case^2) - round(n_case * 2 * p_case * q_case)),

ctrl = c(II = round(n_ctrl * q_ctrl^2),

ID = round(n_ctrl * 2 * p_ctrl * q_ctrl),

DD = n_ctrl - round(n_ctrl * q_ctrl^2) - round(n_ctrl * 2 * p_ctrl * q_ctrl))

)

}

calc_models <- function(g) {

c <- g$case; n <- g$ctrl

data.frame(

Model = c("Allele", "Dominant", "Recessive", "Additive", "Overdominant"),

a = c(2*c["II"]+c["ID"], c["II"]+c["ID"], c["II"], c["II"], c["ID"]),

b = c(2*n["II"]+n["ID"], n["II"]+n["ID"], n["II"], n["II"], n["ID"]),

c = c(2*c["DD"]+c["ID"], c["DD"], c["ID"]+c["DD"], c["DD"], c["II"]+c["DD"]),

d = c(2*n["DD"]+n["ID"], n["DD"], n["ID"]+n["DD"], n["DD"], n["II"]+n["DD"]),

stringsAsFactors = FALSE

) %>% mutate(

OR = ((a+0.5)*(d+0.5))/((b+0.5)*(c+0.5)),

SE = sqrt(1/(a+0.5) + 1/(b+0.5) + 1/(c+0.5) + 1/(d+0.5)),

LCI = exp(log(OR) - 1.96*SE),

UCI = exp(log(OR) + 1.96*SE)

)

}

results <- list()

genotype_counts <- list()

cat("Starting analysis...\n\n")

for(i in 1:nrow(gwas_info)) {

ds <- gwas_info$dataset[i]

f <- file.path(work_dir, gwas_info$file[i])

cat(sprintf("[%d/7] %s: ", i, ds))

if(!file.exists(f)) {

cat("FILE NOT FOUND\n")

next

}

dt <- tryCatch({

fread(f, select = c("rsid", "effect_allele", "other_allele", "beta",

"standard_error", "effect_allele_frequency", "p_value"))

}, error = function(e) NULL)

if(is.null(dt)) {

cat("READ ERROR\n")

next

}

snp <- dt[rsid == REF_PARAMS$proxy_snp]

if(nrow(snp) == 0) {

cat("SNP NOT FOUND\n")

next

}

cat("Found -> ")

beta <- as.numeric(snp$beta[1])

eaf <- as.numeric(snp$effect_allele_frequency[1])

pval <- as.numeric(snp$p_value[1])

eaf_case <- eaf

geno <- reconstruct_genotypes(eaf_case, REF_PARAMS$d_allele_freq_ctrl,

gwas_info$n_case[i], gwas_info$n_ctrl[i])

models <- calc_models(geno)

models$Dataset <- ds

models$EAF_Case <- eaf_case

models$N_Case <- gwas_info$n_case[i]

models$N_Ctrl <- gwas_info$n_ctrl[i]

models$Beta <- beta

models$P_value <- pval

results[[ds]] <- models

genotype_counts[[ds]] <- data.frame(

Dataset = ds, Group = c("Case", "Control"),

II = c(geno$case["II"], geno$ctrl["II"]),

ID = c(geno$case["ID"], geno$ctrl["ID"]),

DD = c(geno$case["DD"], geno$ctrl["DD"]),

EAF_D = c(eaf_case, REF_PARAMS$d_allele_freq_ctrl)

)

od_or <- models$OR[models$Model == "Overdominant"]

cat(sprintf("Overdom OR=%.3f\n", od_or))

}

if(length(results) > 0) {

all_res <- bind_rows(results)

all_geno <- bind_rows(genotype_counts)

write.csv(all_res, file.path(output_dir, "all_models_results.csv"), row.names = FALSE)

write.csv(all_geno, file.path(output_dir, "genotype_counts.csv"), row.names = FALSE)

cat(sprintf("\nResults saved to %s (%d datasets processed)\n", output_dir, length(results)))

cat("\n=== Overdominant Model Summary ===\n")

od_summary <- all_res %>%

filter(Model == "Overdominant") %>%

select(Dataset, OR, LCI, UCI, P_value, EAF_Case) %>%

arrange(OR)

print(od_summary, row.names = FALSE)

if(length(results) >= 2) {

cat("\n=== Meta-Analysis (Overdominant) ===\n")

od_data <- all_res %>% filter(Model == "Overdominant")

ma <- metagen(TE = log(od_data$OR), seTE = od_data$SE, studlab = od_data$Dataset)

cat(sprintf("Pooled OR: %.3f (%.3f-%.3f), I2=%.1f%%, p=%.2e\n",

exp(ma$TE.random), exp(ma$lower.random), exp(ma$upper.random),

ma$I2, ma$pval.random))

}

} else {

cat("ERROR: No datasets processed successfully\n")

}

African‐ancestry analysis: ACE I/D genotype

# African Population ACE I/D Final Downstream Analysis (Fixed map_df)

# Input: Pre-calculated African counts

# RLS: 1303 325 651 326

# Ctrl:119437 78363 36763 4312

rm(list = ls())

setwd("~/Downloads")

library(data.table); library(dplyr); library(meta); library(ggplot2); library(openxlsx)

## 1. Input African counts ----------------------------------------------------

counts <- data.frame(

Group = c("RLS_AFR","Control_AFR"),

N = c(1303, 119437),

II = c(325, 78363),

ID = c(651, 36763),

DD = c(326, 4312)

)

## 2. HWE + Heterozygote Ratio ------------------------------------------------

hwe_summary <- function(II, ID, DD, label){

N <- sum(II, ID, DD)

p <- (2*II + ID)/(2*N)

exp <- c(N*p^2, 2*N*p*(1-p), N*(1-p)^2)

chi <- sum((c(II, ID, DD) - exp)^2 / exp)

pval <- pchisq(chi, 1, lower = FALSE)

ho_ratio <- (ID/N) / (2*p*(1-p))

tibble(label, N, p, ho_ratio, pval)

}

hwe_tbl <- bind_rows(

hwe_summary(325, 651, 326, "RLS_AFR"),

hwe_summary(78363, 36763, 4312, "Control_AFR")

)

cat("=== AFR HWE ===\n"); print(hwe_tbl)

## 3. 5 Genetic Model ORs (Using lapply + bind_rows instead of map_df) --------------

make_2x2 <- function(II, ID, DD, N, model){

switch(model,

"Allele" = list(aE = 2*II + ID, aC = 2*(N-II-ID),

bE = 2*II + ID, bC = 2*(N-II-ID)),

"Dominant" = list(aE = II + ID, aC = DD,

bE = II + ID, bC = DD),

"Recessive" = list(aE = II, aC = ID + DD,

bE = II, bC = ID + DD),

"Additive" = list(aE = II, aC = DD,

bE = II, bC = DD),

"Overdominant" = list(aE = ID, aC = II + DD,

bE = ID, bC = II + DD))

}

model_names <- c("Allele","Dominant","Recessive","Additive","Overdominant")

or_lst <- lapply(model_names, function(m){

case <- make_2x2(325, 651, 326, 1303, m)

ctrl <- make_2x2(78363, 36763, 4312, 119437, m)

OR <- (case$aE * ctrl$bC) / (case$aC * ctrl$bE)

SE <- sqrt(sum(1/c(case$aE, case$aC, ctrl$bE, ctrl$bC)))

data.frame(Model = m, OR = OR,

LCI = exp(log(OR) - 1.96*SE),

UCI = exp(log(OR) + 1.96*SE),

p = 2*(1 - pnorm(abs(log(OR)/SE))))

})

or_tbl <- bind_rows(or_lst)

cat("\n=== AFR 5 Model ORs ===\n"); print(or_tbl)

## 4. Forest Plot ------------------------------------------------------------

forest_dat <- or_tbl %>% mutate(Study = "GCST90477503_AFR")

plt <- ggplot(forest_dat, aes(x = OR, xmin = LCI, xmax = UCI, y = Model)) +

geom_vline(xintercept = 1, linetype = "dashed", color = "red") +

geom_point(size = 3, color = "steelblue") +

geom_errorbarh(height = 0.2, color = "steelblue") +

labs(x = "Odds Ratio (95% CI)", y = "",

title = "ACE I/D vs RLS – African ancestry (strong signal)") +

theme_minimal(base_size = 14)

ggsave("AFR_ACE_forest_final.pdf", plot = plt, width = 6, height = 4)

## 5. Summary Excel --------------------------------------------------------

wb <- createWorkbook()

addWorksheet(wb, "HWE"); addWorksheet(wb, "GeneticModels")

writeData(wb, "HWE", hwe_tbl); writeData(wb, "GeneticModels", or_tbl)

saveWorkbook(wb, "AFR_ACE_final_analysis.xlsx", overwrite = TRUE)

cat("\n African population final analysis completed! Outputs:\n",

" - AFR_ACE_forest_final.pdf\n",

" - AFR_ACE_final_analysis.xlsx\n")

AMR Analysis

# Input: GCST90475828_AMR_ACE_genotype_counts.txt

############################################################

rm(list = ls())

setwd("~/Downloads")

## 0. Required Packages ---------------------------------------------------------

pkgs <- c("data.table", "dplyr", "purrr", "meta", "ggplot2", "openxlsx")

for (p in pkgs) if (!requireNamespace(p, quietly = TRUE)) install.packages(p)

lapply(pkgs, library, character.only = TRUE)

## 1. Load AMR Genotype Count Table -----------------------------------------

counts <- fread("GCST90475828_AMR_ACE_genotype_counts.txt")

## 2. HWE Test + Heterozygote Ratio ------------------------------------------

hwe_summary <- function(n_II, n_ID, n_DD, label = ""){

N <- sum(n_II, n_ID, n_DD)

p <- (2*n_II + n_ID)/(2*N)

exp <- c(N*p^2, 2*N*p*(1-p), N*(1-p)^2)

chi <- sum((c(n_II, n_ID, n_DD) - exp)^2 / exp)

pval <- pchisq(chi, 1, lower = FALSE)

ho_ratio <- (n_ID/N) / (2*p*(1-p))

return(tibble(label, N, p, ho_ratio, pval))

}

hwe_tbl <- bind_rows(

hwe_summary(counts$II[1], counts$ID[1], counts$DD[1], "RLS"),

hwe_summary(counts$II[2], counts$ID[2], counts$DD[2], "Control")

)

cat("=== HWE Results ===\n"); print(hwe_tbl)

## 3. 5 Genetic Models 2×2 Table & OR ----------------------------------------

make_2x2 <- function(II, ID, DD, N, model){

switch(model,

"Allele" = list(aE = 2*II + ID, aC = 2*(N-II-ID),

bE = 2*II + ID, bC = 2*(N-II-ID)),

"Dominant" = list(aE = II + ID, aC = DD,

bE = II + ID, bC = DD),

"Recessive" = list(aE = II, aC = ID + DD,

bE = II, bC = ID + DD),

"Additive" = list(aE = II, aC = DD,

bE = II, bC = DD),

"Overdominant" = list(aE = ID, aC = II + DD,

bE = ID, bC = II + DD))

}

model_names <- c("Allele","Dominant","Recessive","Additive","Overdominant")

or_tbl <- map_df(model_names, function(m){

case <- make_2x2(counts$II[1], counts$ID[1], counts$DD[1], counts$N[1], m)

ctrl <- make_2x2(counts$II[2], counts$ID[2], counts$DD[2], counts$N[2], m)

OR <- (case$aE * ctrl$bC) / (case$aC * ctrl$bE)

SE <- sqrt(sum(1/c(case$aE, case$aC, ctrl$bE, ctrl$bC)))

data.frame(Model = m, OR = OR,

LCI = exp(log(OR) - 1.96*SE),

UCI = exp(log(OR) + 1.96*SE),

p = 2*(1 - pnorm(abs(log(OR)/SE))))

})

cat("\n=== 5 Model ORs ===\n"); print(or_tbl)

## 4. Forest Plot ------------------------------------------------------------

forest_dat <- or_tbl %>% mutate(Study = "GCST90475828_AMR")

plt <- ggplot(forest_dat, aes(x = OR, xmin = LCI, xmax = UCI, y = Model)) +

geom_vline(xintercept = 1, linetype = "dashed", color = "red") +

geom_point(size = 3, color = "steelblue") +

geom_errorbarh(height = 0.2, color = "steelblue") +

labs(x = "Odds Ratio (95% CI)", y = "") +

theme_minimal(base_size = 14)

ggsave("AMR_ACE_forest_single.pdf", plot = plt, width = 6, height = 4)

## 5. Summary Excel --------------------------------------------------------

wb <- createWorkbook()

addWorksheet(wb, "HWE"); addWorksheet(wb, "GeneticModels")

writeData(wb, "HWE", hwe_tbl); writeData(wb, "GeneticModels", or_tbl)

saveWorkbook(wb, "AMR_ACE_post_analysis.xlsx", overwrite = TRUE)

cat("\n All completed! Output files:\n",

" - AMR_ACE_forest_single.pdf\n",

" - AMR_ACE_post_analysis.xlsx\n")
