# Supplementary material
Source: Research Square preprint supplement (doi:10.21203/rs.3.rs-9624406/v1)
Supplement: Supplementary file 1 [file 69f01f93973b3c531a20a62d.xlsx]

## Sheet: P1.Statistic table
Dataset	Group	N	II	ID	DD
GCST90399568	Case	7248	14	619	6615
GCST90399568	Control	19802	6661	9648	3493
GCST90399569	Case	8500	17	726	7757
GCST90399569	Control	15000	5046	7308	2646
GCST90399570	Case	8500	17	732	7751
GCST90399570	Control	15000	5046	7308	2646
GCST90399571	Case	8500	19	758	7723
GCST90399571	Control	15000	5046	7308	2646
GCST90399572	Case	8500	17	733	7750
GCST90399572	Control	15000	5046	7308	2646
GCST90399573	Case	8500	20	783	7697
GCST90399573	Control	15000	5046	7308	2646
GCST90435387	Case	8500	17	721	7762
GCST90435387	Control	15000	5046	7308	2646
Genotype counts were reconstructed from proxy SNP (rs76806643) allele frequencies and OR values under Hardy-Weinberg equilibrium assumptions.

## Sheet: P2.Genetic models
Model	Dataset	a	b	c	d	OR	LCI	UCI	SE_logOR
Allele (D vs I)	GCST90399568	13725	22970	771	16634	12.8834	11.9499	13.8898	0.0383756
Dominant (DD+ID vs II)	GCST90399568	7233	16309	15	3493	99.9624	60.6478	164.763	0.254955
Recessive (DD vs ID+II)	GCST90399568	6492	6661	756	13141	16.9307	15.6156	18.3567	0.0412567
Additive (DD vs II)	GCST90399568	6492	6661	15	3493	219.669	133.221	362.214	0.25516
Overdominant (ID vs II+DD)	GCST90399568	741	9648	6507	10154	0.119921	0.1106	0.130028	0.0412845
Allele (D vs I)	GCST90399569	15501	17400	1499	12600	7.48606	7.06597	7.93113	0.0294657
Dominant (DD+ID vs II)	GCST90399569	8448	12354	52	2646	34.472	26.1952	45.3641	0.140088
Recessive (DD vs ID+II)	GCST90399569	7053	5046	1447	9954	9.61203	8.99882	10.267	0.0336338
Additive (DD vs II)	GCST90399569	7053	5046	52	2646	70.4575	53.4878	92.8109	0.140589
Overdominant (ID vs II+DD)	GCST90399569	1395	7308	7105	7692	0.206716	0.193568	0.220757	0.0335283
Allele (D vs I)	GCST90399570	16671	17400	329	12600	36.6391	32.7759	40.9577	0.0568482
Dominant (DD+ID vs II)	GCST90399570	8499	12354	1	2646	1213.8	244.812	6018.18	0.81685
Recessive (DD vs ID+II)	GCST90399570	8172	5046	328	9954	49.0737	43.7262	55.0752	0.0588652
Additive (DD vs II)	GCST90399570	8172	5046	1	2646	2857.23	576.19	14168.5	0.816924
Overdominant (ID vs II+DD)	GCST90399570	327	7308	8173	7692	0.0421738	0.0375923	0.0473137	0.0586737
Allele (D vs I)	GCST90399571	14313	17400	2687	12600	3.85677	3.67913	4.04298	0.024058
Dominant (DD+ID vs II)	GCST90399571	8306	12354	194	2646	9.1484	7.88794	10.6103	0.0756345
Recessive (DD vs ID+II)	GCST90399571	6007	5046	2493	9954	4.75241	4.48603	5.0346	0.0294298
Additive (DD vs II)	GCST90399571	6007	5046	194	2646	16.1978	13.9368	18.8256	0.0767063
Overdominant (ID vs II+DD)	GCST90399571	2299	7308	6201	7692	0.39028	0.368443	0.41341	0.029376
Allele (D vs I)	GCST90399572	15278	17400	1722	12600	6.42314	6.08039	6.78522	0.0279792
Dominant (DD+ID vs II)	GCST90399572	8426	12354	74	2646	24.2291	19.2141	30.5532	0.118323
Recessive (DD vs ID+II)	GCST90399572	6852	5046	1648	9954	8.19954	7.6947	8.7375	0.0324216
Additive (DD vs II)	GCST90399572	6852	5046	74	2646	48.2363	38.2065	60.8991	0.118932
Overdominant (ID vs II+DD)	GCST90399572	1574	7308	6926	7692	0.239259	0.224561	0.254919	0.0323469
Allele (D vs I)	GCST90399573	16120	17400	880	12600	13.2579	12.3418	14.242	0.0365319
Dominant (DD+ID vs II)	GCST90399573	8485	12354	15	2646	117.271	71.1245	193.36	0.255133
Recessive (DD vs ID+II)	GCST90399573	7635	5046	865	9954	17.402	16.0957	18.8143	0.0398118
Additive (DD vs II)	GCST90399573	7635	5046	15	2646	258.337	156.602	426.165	0.255388
Overdominant (ID vs II+DD)	GCST90399573	850	7308	7650	7692	0.11701	0.108258	0.12647	0.039665
Allele (D vs I)	GCST90435387	14400	17400	2598	12600	4.01311	3.82636	4.20898	0.0243128
Dominant (DD+ID vs II)	GCST90435387	8319	12354	180	2646	9.8734	8.46994	11.5094	0.0782251
Recessive (DD vs ID+II)	GCST90435387	6081	5046	2418	9954	4.96014	4.6805	5.25648	0.0296062
Additive (DD vs II)	GCST90435387	6081	5046	180	2646	17.6691	15.1271	20.6383	0.0792503
Overdominant (ID vs II+DD)	GCST90435387	2238	7308	6261	7692	0.376286	0.355111	0.398724	0.0295509

## Sheet: P3.Best fitting model
Model	Studies	Raw_OR	Raw_95CI	I2_percent	Heterogeneity_p	Tau2	AIC	Corrected_OR	Corrected_95CI
Dominant (DD+ID vs II)	7	46.9588	(14.8188-148.8059)	1	0	2.3211	286	79.374	(21.4023-294.3724)
Additive (DD vs II)	7	96.5563	(27.9436-333.6405)	1	0	2.6965	335	180.066	(44.0039-736.8405)
Overdominant (ID vs II+DD)	7	0.1713	(0.096-0.3058)	1	0	0.6105	1996	0.1347	(0.0697-0.2602)
Recessive (DD vs ID+II)	7	11.5057	(6.2592-21.1498)	1	0	0.6738	2236	16.054	(8.0377-32.0652)
Allele (D vs I)	7	8.9573	(4.9837-16.0991)	1	0	0.6251	2525	12.0787	(6.2039-23.5164)
