# Supplementary material
Source: Research Square preprint supplement (doi:10.21203/rs.3.rs-9624406/v1)
Supplement: Supplementary file 3 [file b6543e60e214aa6b79a746b2.xlsx]

## Sheet: -Supplementary Table 4(CrossAnc
Ancestry	OR	LCI	UCI	Direction
European	0.242775	0.172053	0.342568	Protective (ID)
African	2.249	2.016	2.509	Risk (ID excess)
Latin American	1	0.89	1.124	Null
