# Supplementary material
Source: Research Square preprint supplement (doi:10.21203/rs.3.rs-9624406/v1)
Supplement: Supplementary file 4 [file d4c8cf09a6393324a42f1a10.xlsx]

## Sheet: Genotype table
Group	N	II	ID	DD
RLS	1 303	325	651	326
Control	119 437	78 363	36 763	4 312

## Sheet: HWE
label	N	p	ho_ratio	pval
RLS_AFR	1302	0.499616	1	0.999983
Control_AFR	119438	0.809998	0.99999	0.997273

## Sheet: GeneticModels
Model	OR	LCI	UCI	p
Allele	0.0886444	0.0804983	0.0976148	0
Dominant	0.112134	0.0985616	0.127575	0
Recessive	0.174363	0.15371	0.197792	0
Additive	0.0548572	0.0469023	0.0641612	0
Overdominant	2.24886	2.01596	2.50868	0
