# Supplementary material
Source: Research Square preprint supplement (doi:10.21203/rs.3.rs-9624406/v1)
Supplement: Supplementary file 5 [file d5afca8e2233876338226ab5.xlsx]

## Sheet: Genotype table
Group	N	II	ID	DD
RLS	1148	289	574	285
Control	57993	14452	28996	14545

## Sheet: HWE
label	N	p	ho_ratio	pval
RLS	1148	0.501742	1.00001	0.999672
Control	57993	0.499198	0.999985	0.997181

## Sheet: GeneticModels
Model	OR	LCI	UCI	p
Allele	1.01541	0.91754	1.12373	0.767393
Dominant	1.0137	0.885496	1.16047	0.84363
Recessive	1.01362	0.885964	1.15967	0.843843
Additive	1.02056	0.865125	1.20392	0.809233
Overdominant	1.00003	0.889763	1.12397	0.999538
